# Supplementary material
Source: MDPI journal article supplement (https://www.mdpi.com/2075-4701/12/12/2021)
Supplement: s1 [file s1]

## Article

# A Multifocal Study Investigation of Pyrolyzed Printed Circuit Board Leaching

Gvozden Jovanović <sup>1</sup>, Mladen Bugarčić <sup>1</sup>, Nela Petronijević <sup>1</sup>, Srećko R. Stopić <sup>2</sup>, Bernd Friedrich <sup>2</sup>,  
Branislav Marković <sup>1,\*</sup>, Srđan Stanković <sup>3</sup> and Miroslav Sokić <sup>1</sup>

<sup>1</sup> Institute for Technology of Nuclear and Other Mineral Raw Materials, 11000 Belgrade, Serbia

<sup>2</sup> IME Process Metallurgy and Metal Recycling, RWTH Aachen University, 52056 Aachen, Germany

<sup>3</sup> Federal Institute for Geosciences and Natural Resources, Stilleweg 2, 30655 Hannover, Germany

\* Correspondence: b.markovic@itnms.ac.rs; Tel.: +381-11-3691-722

Origin of present elements in the element distribution Table 1 can be explained by various computer components. Therefore the following elements can be found in:

- Silver (Ag) – Alloy electrum
- Gold (Au) – Alloy electrum, also present in elemental form
- Aluminum (Al) – Present in elemental form
- Barium (Ba) – Present as BaSO<sub>4</sub> but also as Ba<sub>x</sub>Sr<sub>1-x</sub>TiO<sub>3</sub>
- Carbon (C) – Formed during pyrolysis, originates from polymer materials
- Calcium (Ca) – Present as CaF<sub>2</sub>
- Cerium (Ce) – Present as CeO<sub>2</sub>
- Cobalt (Co) – Present as LiCoO<sub>2</sub>
- Copper (Cu) – Present in elemental form
- Iron (Fe) – Present mainly in elemental form, as an oxide and as Nd<sub>2</sub>Fe<sub>14</sub>B
- Lithium (Li) – Present as LiCoO<sub>2</sub> and as organometallic Li present in polymer
- Neodymium (Nd) – Present as Nd<sub>2</sub>Fe<sub>14</sub>B
- Nickel (Ni) – Present in elemental form
- Manganese (Mn) – Present as an alloy but also as a dopant in LiCoO<sub>2</sub>
- Lead (Pb) – Present as a soldering alloy PbSn60
- Palladium (Pd) – In elemental form
- Platinum (Pt) – Present in elemental form
- Silicon (Si) – Present as SiO<sub>2</sub>
- Tin (Sn) – Present as a soldering alloy PbSn60
- Yttrium (Y) – Mainly present as Y<sub>2</sub>O<sub>3</sub>
- Zinc (Zn) – Present as ZnO as well as ZnS

**Table S1.** Leaching degree after 4 hours.

| Leaching Medium                   | S/L   | T (°C) | Leaching Degree (%) |       |       |       |       |      |      |       |       |
|-----------------------------------|-------|--------|---------------------|-------|-------|-------|-------|------|------|-------|-------|
|                                   |       |        | Al                  | Cu    | Zn    | Sn    | Ca    | Pb   | Ba   | Co    | Nd    |
| 1M H <sub>2</sub> SO <sub>4</sub> | 0.025 | 60     | 42.74               | 34.00 | 41.20 | 7.75  | 14.89 | 0.97 | 0.05 | 83.10 | 74.50 |
| 1M H <sub>2</sub> SO <sub>4</sub> | 0.042 | 60     | 40.32               | 35.06 | 44.2  | 1.82  | 8.93  | 0.64 | 0.03 | 77.14 | 67.71 |
| 1M H <sub>2</sub> SO <sub>4</sub> | 0.058 | 60     | 34.00               | 24.71 | 38.48 | 1.42  | 6.41  | 0.45 | 0.02 | 61.63 | 40.89 |
| 2M H <sub>2</sub> SO <sub>4</sub> | 0.025 | 60     | 55.47               | 33.67 | 41.11 | 50.92 | 14.89 | 0.71 | 0.05 | 57.14 | 54.86 |
| 2M H <sub>2</sub> SO <sub>4</sub> | 0.042 | 60     | 47.20               | 26.20 | 40.53 | 6.61  | 8.93  | 0.43 | 0.03 | 66.86 | 55.82 |
| 2M H <sub>2</sub> SO <sub>4</sub> | 0.058 | 60     | 42.80               | 22.71 | 40.19 | 3.28  | 6.38  | 0.35 | 0.02 | 58.78 | 48.52 |

|                                                                                  |       |    |       |       |       |       |       |       |       |       |       |
|----------------------------------------------------------------------------------|-------|----|-------|-------|-------|-------|-------|-------|-------|-------|-------|
| 3M H <sub>2</sub> SO <sub>4</sub>                                                | 0.025 | 60 | 54.55 | 27.33 | 40.98 | 44.77 | 20.69 | 0.39  | 0.05  | 77.14 | 48.44 |
| 0.5M H <sub>2</sub> SO <sub>4</sub>                                              | 0.025 | 60 | 35.59 | 37.33 | 41.42 | 1.37  | 35.33 | 0.95  | 0.05  | 81.90 | 66.06 |
| 0.5M H <sub>2</sub> SO <sub>4</sub>                                              | 0.025 | 80 | 37.03 | 40.25 | 44.57 | 1.72  | 15.14 | 0.47  | 0.02  | 76.73 | 69.67 |
| 1M H <sub>2</sub> SO <sub>4</sub>                                                | 0.042 | 40 | 24.40 | 21.70 | 35.20 | 1.30  | 21.20 | 0.62  | 0.03  | 71.43 | 68.26 |
| 2M H <sub>2</sub> SO <sub>4</sub>                                                | 0.100 | 60 | 41.58 | 18.08 | 41.00 | 16.12 | 8.49  | 0.22  | 0.06  | 78.57 | /     |
| 2M H <sub>2</sub> SO <sub>4</sub>                                                | 0.150 | 60 | 35.20 | 16.94 | 39.26 | 4.26  | 5.76  | 0.19  | 0.04  | 52.86 | /     |
| 2M H <sub>2</sub> SO <sub>4</sub>                                                | 0.200 | 60 | 33.89 | 13.42 | 40.00 | 9.73  | 4.44  | 0.16  | 0.03  | 55.00 | /     |
| 2M H <sub>2</sub> SO <sub>4</sub>                                                | 0.300 | 60 | 34.16 | 10.92 | 40.37 | 5.32  | 3.17  | 0.14  | 0.02  | 53.25 | /     |
| 2M H <sub>2</sub> SO <sub>4</sub> + 2M H <sub>2</sub> O <sub>2</sub>             | 0.081 | 60 | 50.82 | 83.74 | 49.38 | 5.98  | 11.75 | 0.49  | 0.07  | 70.25 | /     |
| 2M H <sub>2</sub> SO <sub>4</sub> + 2M H <sub>2</sub> O <sub>2</sub>             | 0.121 | 60 | 48.60 | 80.16 | 49.38 | 3.36  | 8.23  | 0.30  | 0.05  | 65.65 | /     |
| 2M H <sub>2</sub> SO <sub>4</sub> + 2M H <sub>2</sub> O <sub>2</sub>             | 0.162 | 60 | 44.02 | 16.80 | 48.01 | 1.92  | 6.56  | 0.28  | 0.04  | 64.08 | /     |
| 2M H <sub>2</sub> SO <sub>4</sub> + 2M H <sub>2</sub> O <sub>2</sub>             | 0.243 | 60 | 42.61 | 13.01 | 46.64 | 1.00  | 4.27  | 0.21  | 0.02  | 59.28 | /     |
| 2M H <sub>2</sub> SO <sub>4</sub> + 1M H <sub>2</sub> O <sub>2</sub>             | 0.090 | 60 | 50.17 | 73.06 | 45.19 | 2.66  | 9.75  | 0.36  | 0.07  | 59.86 | /     |
| 2M H <sub>2</sub> SO <sub>4</sub> + 3M H <sub>2</sub> O <sub>2</sub>             | 0.074 | 60 | 55.65 | 95.57 | 51.07 | 5.93  | 12.89 | 0.39  | 0.08  | 70.49 | /     |
| 2 M H <sub>2</sub> SO <sub>4</sub> + 1M H <sub>2</sub> O <sub>2</sub>            | 0.179 | 60 | 46.46 | 16.26 | 44.69 | 1.24  | 5.33  | 0.21  | 0.03  | 66.64 | /     |
| 2 M H <sub>2</sub> SO <sub>4</sub> + 3M H <sub>2</sub> O <sub>2</sub>            | 0.148 | 60 | 49.33 | 16.43 | 48.82 | 1.93  | 6.72  | 0.28  | 0.04  | 67.11 | /     |
| AMD                                                                              | 0.100 | 60 | 0     | 10.83 | 28.38 | 0.00  | 3.54  | 0.16  | 0     | 57.86 | /     |
| AMD + 1 M H <sub>2</sub> O <sub>2</sub>                                          | 0.090 | 60 | 1.43  | 9.81  | 28.59 | 0.00  | 3.99  | 0.11  | 0     | 50.76 | /     |
| AMD + 2M H <sub>2</sub> O <sub>2</sub>                                           | 0.081 | 60 | 1.04  | 11.86 | 28.81 | 0.00  | 4.09  | 0.17  | 0     | 46.50 | /     |
| AMD + 3 M H <sub>2</sub> O <sub>2</sub>                                          | 0.074 | 60 | 0     | 14.71 | 38.25 | 0.01  | 7.59  | 0.09  | 0     | 89.08 | /     |
| AMD + 5 ml cc H <sub>2</sub> SO <sub>4</sub>                                     | 0.098 | 60 | 29.78 | 21.46 | 40.73 | 0.14  | 5.10  | 0.30  | 0     | 56.13 | /     |
| AMD + 1 M H <sub>2</sub> O <sub>2</sub> + 5ml cc H <sub>2</sub> SO <sub>4</sub>  | 0.088 | 60 | 23.74 | 48.91 | 37.50 | 0.10  | 6.29  | 0.38  | 0     | 52.82 | /     |
| AMD + 2M H <sub>2</sub> O <sub>2</sub> + 5 ml CC H <sub>2</sub> SO <sub>4</sub>  | 0.079 | 60 | 35.20 | 62.67 | 49.57 | 0.15  | 8.27  | 0.44  | 0     | 86.42 | /     |
| AMD + 3 M H <sub>2</sub> O <sub>2</sub> + 5 ml cc H <sub>2</sub> SO <sub>4</sub> | 0.073 | 60 | 35.58 | 63.44 | 50.75 | 0.13  | 10.41 | 0.49  | 0     | 75.20 | /     |
| H <sub>2</sub> O + 1 M H <sub>2</sub> O <sub>2</sub>                             | 0.090 | 60 | 0.01  | 0.33  | 5.87  | 0.02  | 2.44  | 1.62  | 9.76  | 26.60 | /     |
| H <sub>2</sub> O + 3 M H <sub>2</sub> O <sub>2</sub>                             | 0.074 | 60 | 0.01  | 0.39  | 6.94  | 0.03  | 2.38  | 2.22  | 9.94  | 32.19 | /     |
| NADES                                                                            | 0.100 | 60 | 15.86 | 2.51  | 28.85 | 1.52  | 0.28  | 27.09 | 0.49  | 27.59 | n.d.  |
| NADES + 3M H <sub>2</sub> O <sub>2</sub>                                         | 0.100 | 60 | 6.75  | 17.20 | 29.21 | 3.21  | 0.50  | 17.12 | 0.82  | 44.75 | 11.92 |
| 1 M H <sub>2</sub> SO <sub>4</sub>                                               | 0.100 | 60 | 38.45 | 77.62 | 54.21 | 1.71  | 10.85 | 0.57  | 0.12  | 93.78 | 61.45 |
| 2M HNO <sub>3</sub> + 3M H <sub>2</sub> O <sub>2</sub>                           | 0.100 | 60 | 41.86 | 94.71 | 74.46 | 0.84  | 37.11 | 78.76 | 22.94 | 95.13 | 93.74 |

Table S2. Leaching with two strong oxidizing agents.

|                                                                                                                                                                                                               |          |
|---------------------------------------------------------------------------------------------------------------------------------------------------------------------------------------------------------------|----------|
| $5\text{Al}_{(\text{s})} + 18\text{HNO}_{3(\text{aq})} + 3\text{H}_2\text{O}_{2(\text{aq})} \rightarrow 5\text{Al}(\text{NO}_3)_{3(\text{aq})} + 12\text{H}_2\text{O}_{(\text{l})} + 3\text{NO}_{(\text{g})}$ | Eq. (S1) |
| $5\text{Co}_{(\text{s})} + 12\text{HNO}_{3(\text{aq})} + 2\text{H}_2\text{O}_{2(\text{aq})} \rightarrow 5\text{Co}(\text{NO}_3)_{2(\text{aq})} + 8\text{H}_2\text{O}_{(\text{l})} + 2\text{NO}_{(\text{g})}$  | Eq. (S2) |
| $5\text{Sn}_{(\text{s})} + 12\text{HNO}_{3(\text{aq})} + 2\text{H}_2\text{O}_{2(\text{aq})} \rightarrow 5\text{Sn}(\text{NO}_3)_{2(\text{aq})} + 8\text{H}_2\text{O}_{(\text{l})} + 2\text{NO}_{(\text{g})}$  | Eq. (S3) |
| $5\text{Sn}_{(\text{s})} + 4\text{HNO}_{3(\text{aq})} + 4\text{H}_2\text{O}_{2(\text{aq})} \rightarrow 5\text{SnO}_{2(\text{s})} + 6\text{H}_2\text{O}_{(\text{l})} + 4\text{NO}_{(\text{g})}$                | Eq. (S4) |
| $5\text{Cu}_{(\text{s})} + 12\text{HNO}_{3(\text{aq})} + 2\text{H}_2\text{O}_{2(\text{aq})} \rightarrow 5\text{Cu}(\text{NO}_3)_{2(\text{aq})} + 8\text{H}_2\text{O}_{(\text{l})} + 2\text{NO}_{(\text{g})}$  | Eq. (S5) |
